# Supplementary material
Source: PubMed Central journal article supplement (PMC5876834)
Supplement: jamaophthalmol-136-329-s001.pdf [file jamaophthalmol-136-329-s001.pdf]

## Supplementary Online Content

Gracitelli CPB, Zangwill LM, Diniz-Filho A, et al. Detection of glaucoma progression in individuals of African descent compared with those of European descent. *JAMA Ophthalmol*. Published online February 15, 2018. doi:10.1001/jamaophthalmol.2017.6836

**eTable.** Results of Multivariable Regression Model Evaluating the Effect of Race on Visual Field Variability (SD of Residuals) Adjusting for Covariates and Socioeconomic Variables

This supplementary material has been provided by the authors to give readers additional information about their work.

**eTable.** Results of Multivariable Regression Model Evaluating the Effect of Race on Visual Field Variability (SD of Residuals) Adjusting for Covariates and Socioeconomic Variables

| <b>Parameter</b>                       | <b>Coefficient</b> | <b>95% CI</b>    | <b>P-Value</b> |
|----------------------------------------|--------------------|------------------|----------------|
| <b>Race, AD</b>                        | 0.825              | 0.490 to 1.161   | <0.001         |
| <b>SAP MD spline 1, per 1 dB lower</b> | 0.043              | -0.027 to 0.059  | <0.001         |
| <b>SAP MD spline 2, per 1 dB lower</b> | -0.049             | -0.068 to -0.030 | <0.001         |
| <b>SAP MD spline 3, per 1 dB lower</b> | 0.237              | -0.335 to 0.809  | 0.416          |
| <b>Race X SAP MD spline 1</b>          | 0.011              | -0.008 to 0.031  | 0.244          |
| <b>Race X SAP MD spline 2</b>          | -0.048             | -0.071 to -0.024 | <0.001         |
| <b>Race X SAP MD spline 3</b>          | 1.606              | 0.882 to 2.329   | <0.001         |
| <b>Age, per 1 year older</b>           | -0.001             | -0.003 to 0.001  | 0.550          |
| <b>Follow-up duration, per 1 year</b>  | -0.003             | -0.008 to 0.003  | 0.296          |
| <b>Income, lower than \$25,000</b>     | 0.165              | 0.112 to 0.218   | <0.001         |
| <b>Education, high school degree</b>   | -0.033             | -0.086 to 0.019  | 0.211          |
| <b>Marital status, married</b>         | -0.009             | -0.049 to 0.032  | 0.680          |
| <b>Insurance, yes</b>                  | 0.028              | -0.008 to 0.003  | 0.447          |

AD = African descent; SAP = standard automated perimetry; MD = mean deviation
